# Supplementary material
Source: PubMed Central journal article supplement (PMC5045796)
Supplement: NIHMS810560-supplement.pdf [file NIHMS810560-supplement.pdf]

## Supplementary Materials

### **Combinatorial Extracellular Matrix Microenvironments Promote Survival and Phenotype of Human Induced Pluripotent Stem Cell-Derived Endothelial Cells in Hypoxia**

Luqia Hou, PhD<sup>1,2</sup>, John Coller, PhD<sup>3</sup>, Vanita Natu<sup>3</sup>, Trevor J. Hastie<sup>4,5</sup>, PhD, Ngan F. Huang, PhD<sup>1,2,6</sup> #

<sup>1</sup> Veterans Affairs Palo Alto Health Care System, Palo Alto, CA, USA

<sup>2</sup> Stanford Cardiovascular Institute, Stanford University, Stanford, CA, USA

<sup>3</sup> Stanford Functional Genomics Facility, Stanford, CA, USA

<sup>4</sup> Department of Statistics, Stanford University, Stanford, CA, USA

<sup>5</sup> Research and Policy Department, Stanford School of Medicine, Stanford, CA, USA

<sup>6</sup> Department of Cardiothoracic Surgery, Stanford, CA, USA

#### **#Address for Correspondence:**

Ngan F. Huang, PhD

Assistant Professor

Department of Cardiothoracic Surgery

Stanford University

Address: 300 Pasteur Drive, Stanford, CA 94305-5407

Tel: (650) 849-0559

Fax: (650)-725-3846

Email: ngantina@stanford.edu

### 1. ECM microarray fabrication

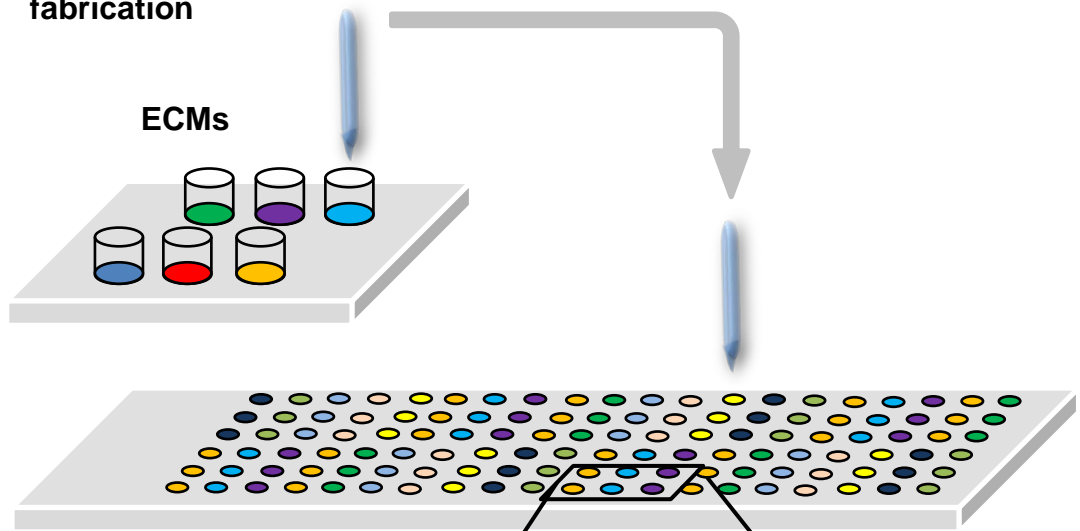

### 2. iPSC-EC seeding

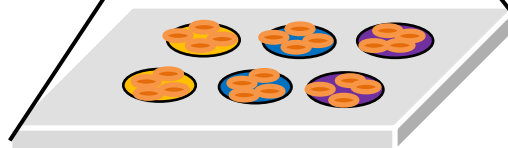

### 3. Induction of Ischemia-like condition

### 4. High-throughput Imaging

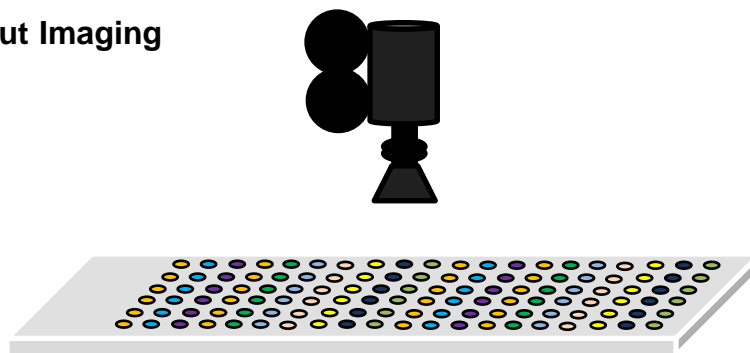

1% O<sub>2</sub> and 1% FBS

**Supplementary Figure 1. Schematic depiction of ECM fabrication and experimental design.** Full-factorial combinations of 6 ECMs were prepared in 384 well dishes. Solid pins were used to draw from the dish and deposit individual ECM combinations onto surface-reactive glass slides. ECM microarray slides were seeded with human iPSC-ECs and treated with hypoxia and reduced serum (1% O<sub>2</sub> and 1% FBS). High-throughput imaging was performed to quantify cell viability, CD31 expression, and NO production.

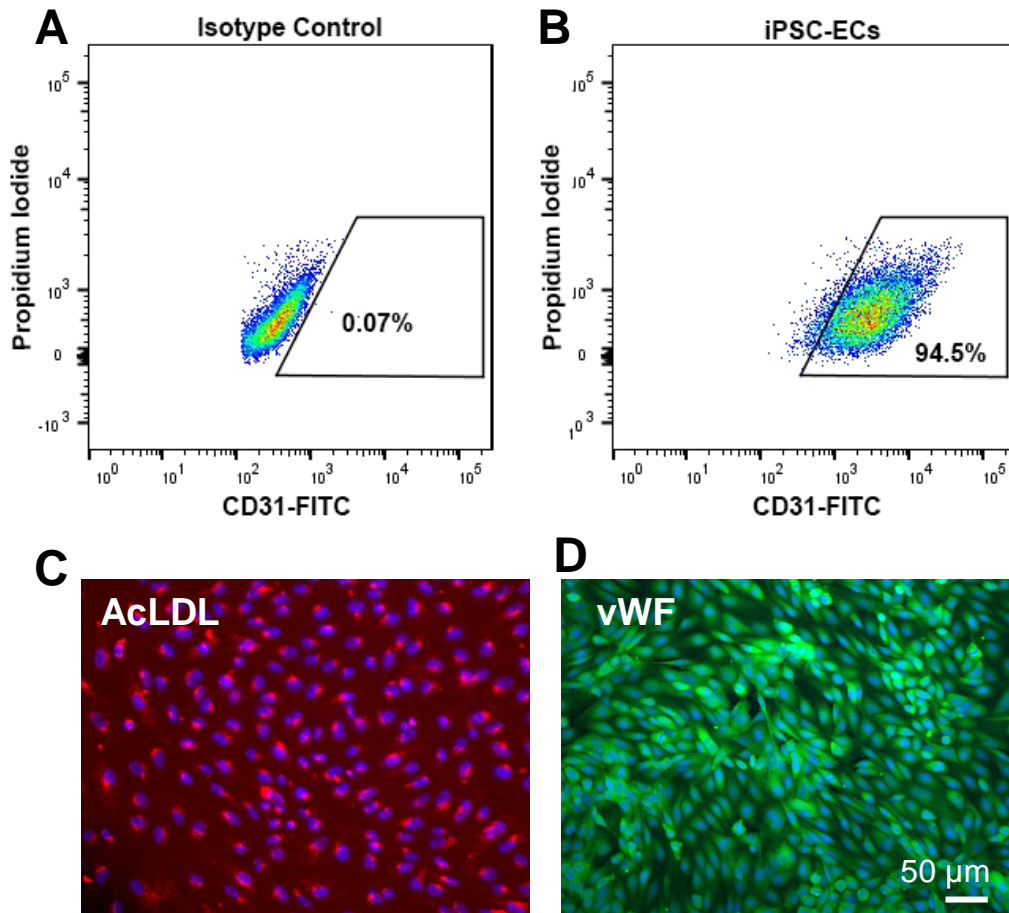

**Supplementary Figure 2. Generation and characterization of human iPSC-ECs.** (A-B) Human iPSC-ECs were generated by differentiation, followed by purification using fluorescence activated cell sorting (FACS) based on CD31 expression. FACS plots showed >90% positive cells were obtained. After expansion of CD31<sup>+</sup> cells, the iPSC-ECs retained expression of endothelial phenotypic markers such as (D) von Willebrand Factor, as well as functionally could (C) uptake acetylated low density lipoprotein.

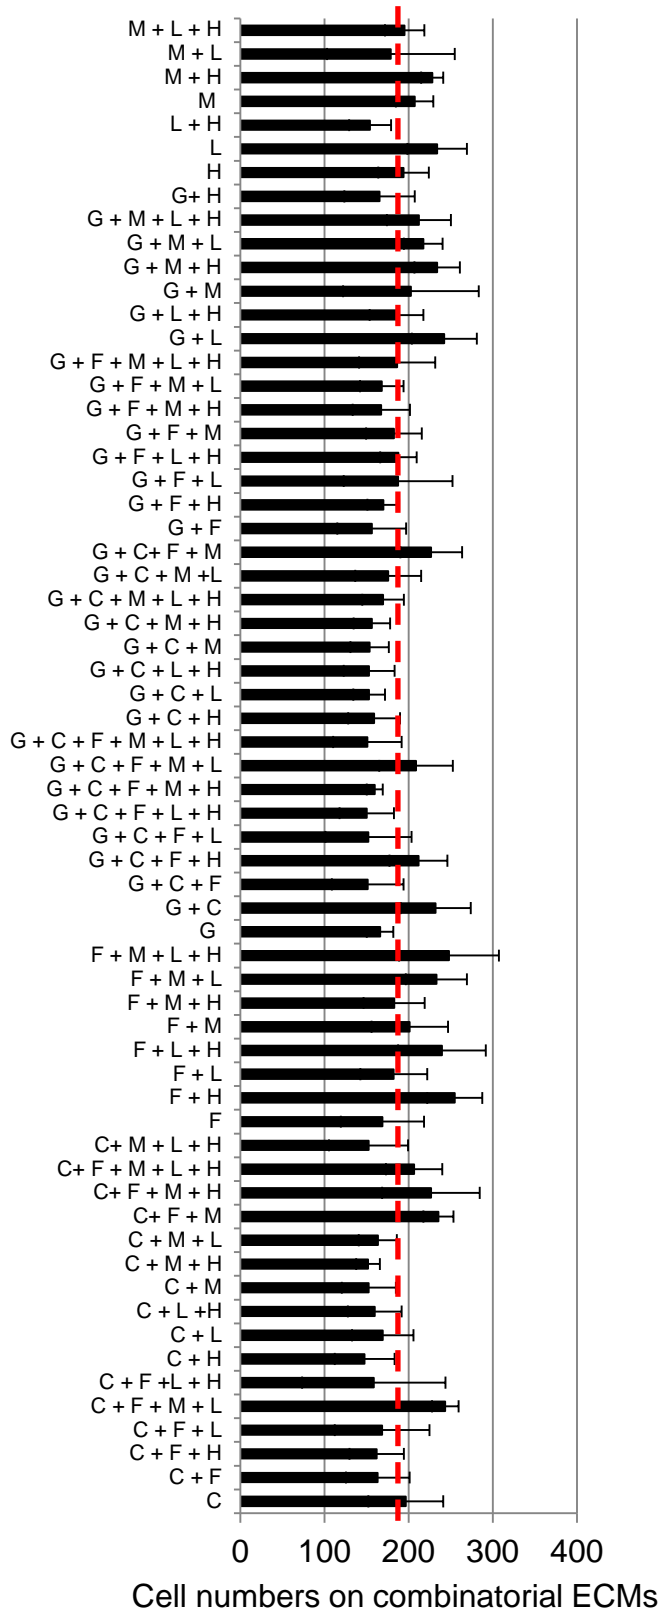

**Supplementary Figure 3. Quantification of cell numbers on combinatorial ECMs.** Total cell nuclei are depicted. Red dotted line depicts average cell nuclei across all combinatorial ECMs (n=6).

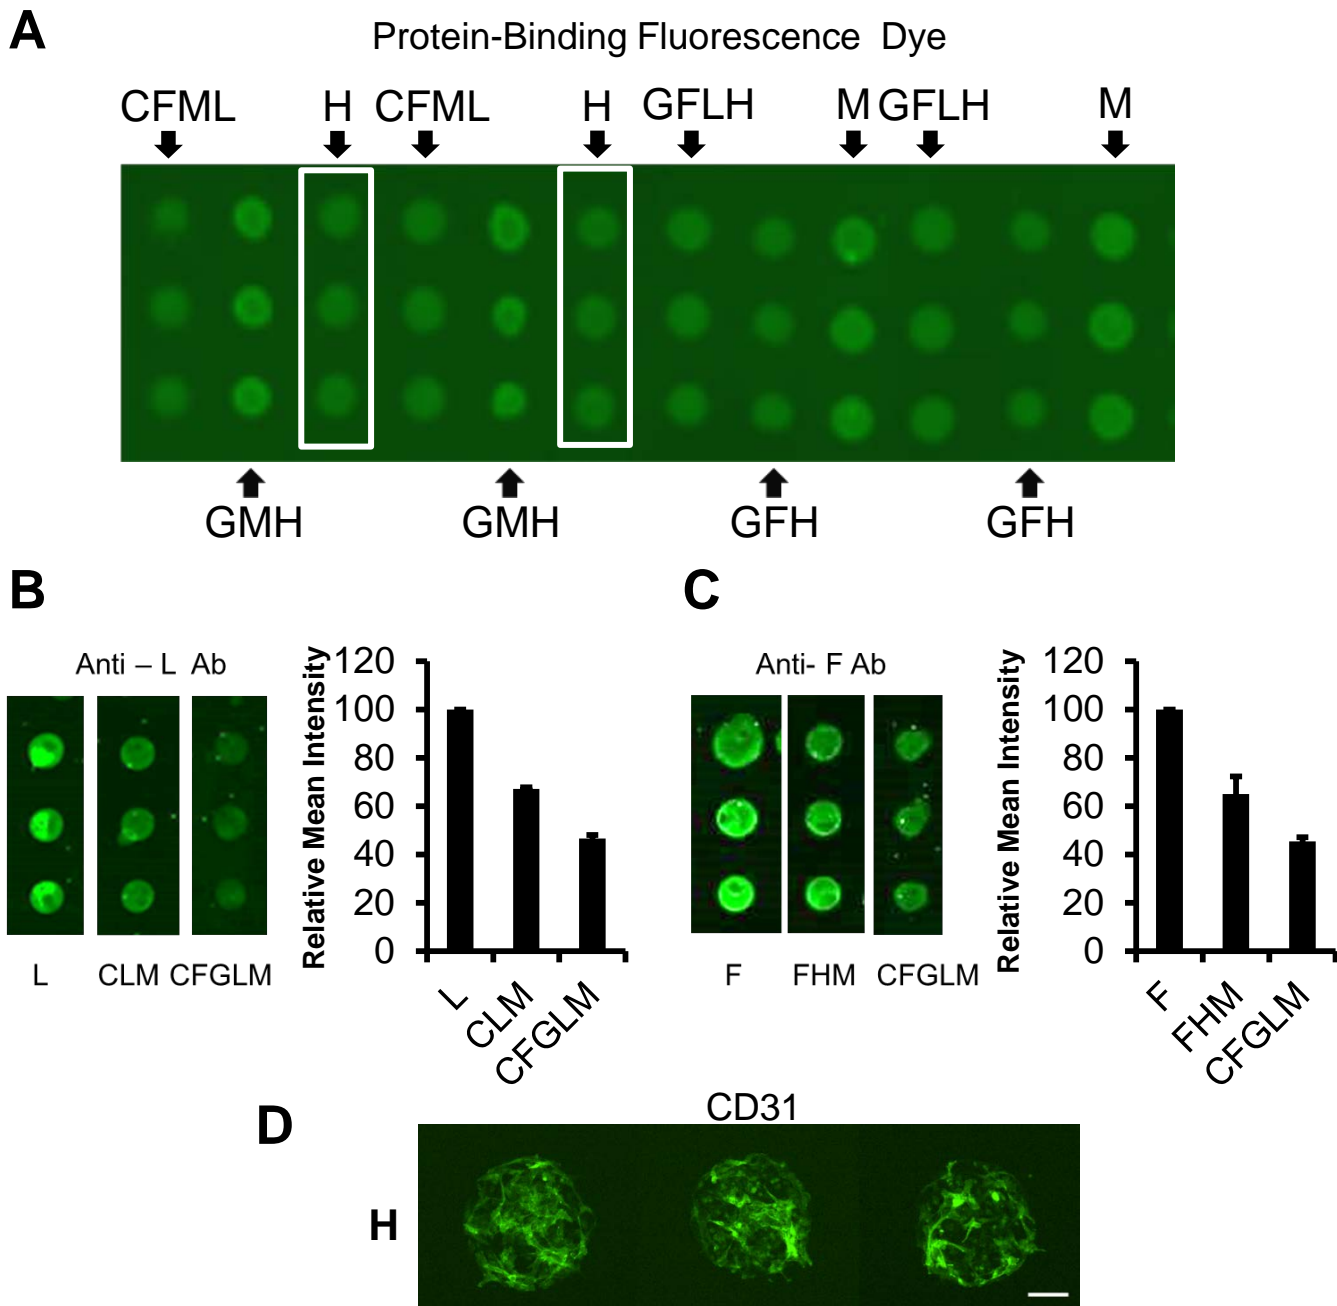

**Supplementary Figure 4. Characterization of ECM microarray slides.** (A) Protein-reactive fluorescence dye was used to visualize ECM islands in triplicates within the ECM microarray slides. Note all ECM islands show positive staining with small variability. (B) Antibody-specific immunofluorescence staining against laminin (L) showed higher fluorescence in 1-factor ECM combinations (L), compared to 3-factor or 5-factor ECM combinations (CLM, GCFML), where laminin was less abundant. (C) Antibody-specific immunofluorescence staining against fibronectin (F) showed higher fluorescence intensity in 3-factor ECM combinations (FGL), compared to 4-factor or 5-factor ECM combinations (FGHM and CFHLM) in which fibronectin was relatively less abundant. ECM islands without F served as negative control (CHL). (D) CD31 expression of cells attached to the microarray slides on three individual heparan sulfate (H) islands. Scale bar: 100  $\mu$ m.

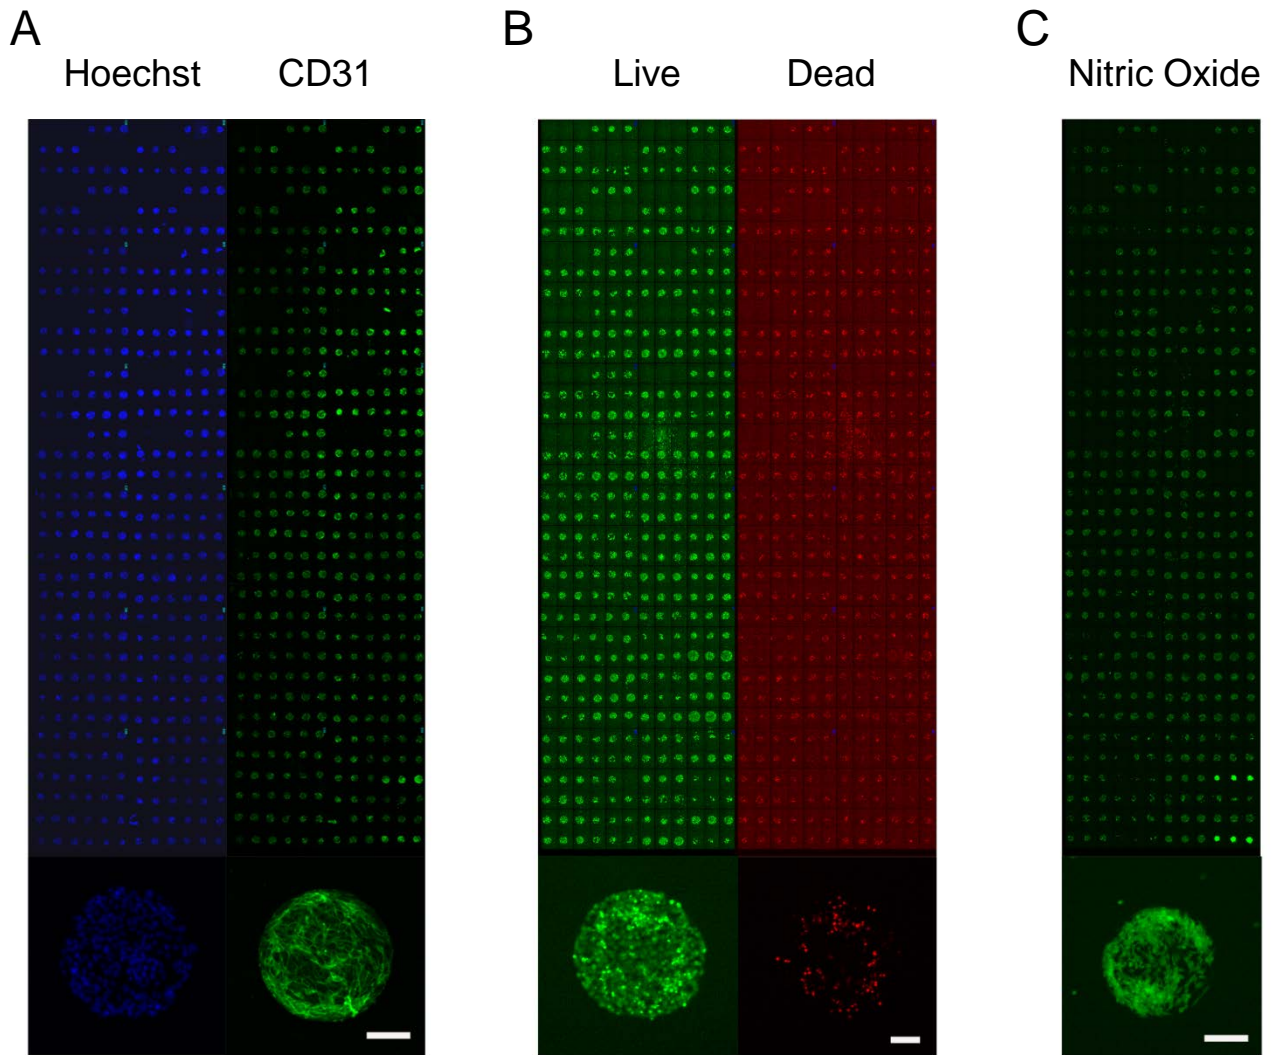

**Supplementary Figure 5. Whole slide scans after hypoxia treatment.** (A) CD31 expression after hypoxia treatment. Left: Hoechst staining for cell nucleus. Right: CD31 staining. Bottom: magnified view of an individual ECM island. (B) Cell survival assay. Left: live cell staining by calcein-AM. Right: dead cell staining by ethidium homodimer-1. Bottom: magnified view of an individual ECM island. (C) Nitric Oxide production assay. DAF-FM was used to evaluate nitric oxide production in live cells on microarray slide. Bottom: Magnified view of an individual ECM island. Scale bar: 100 μm.

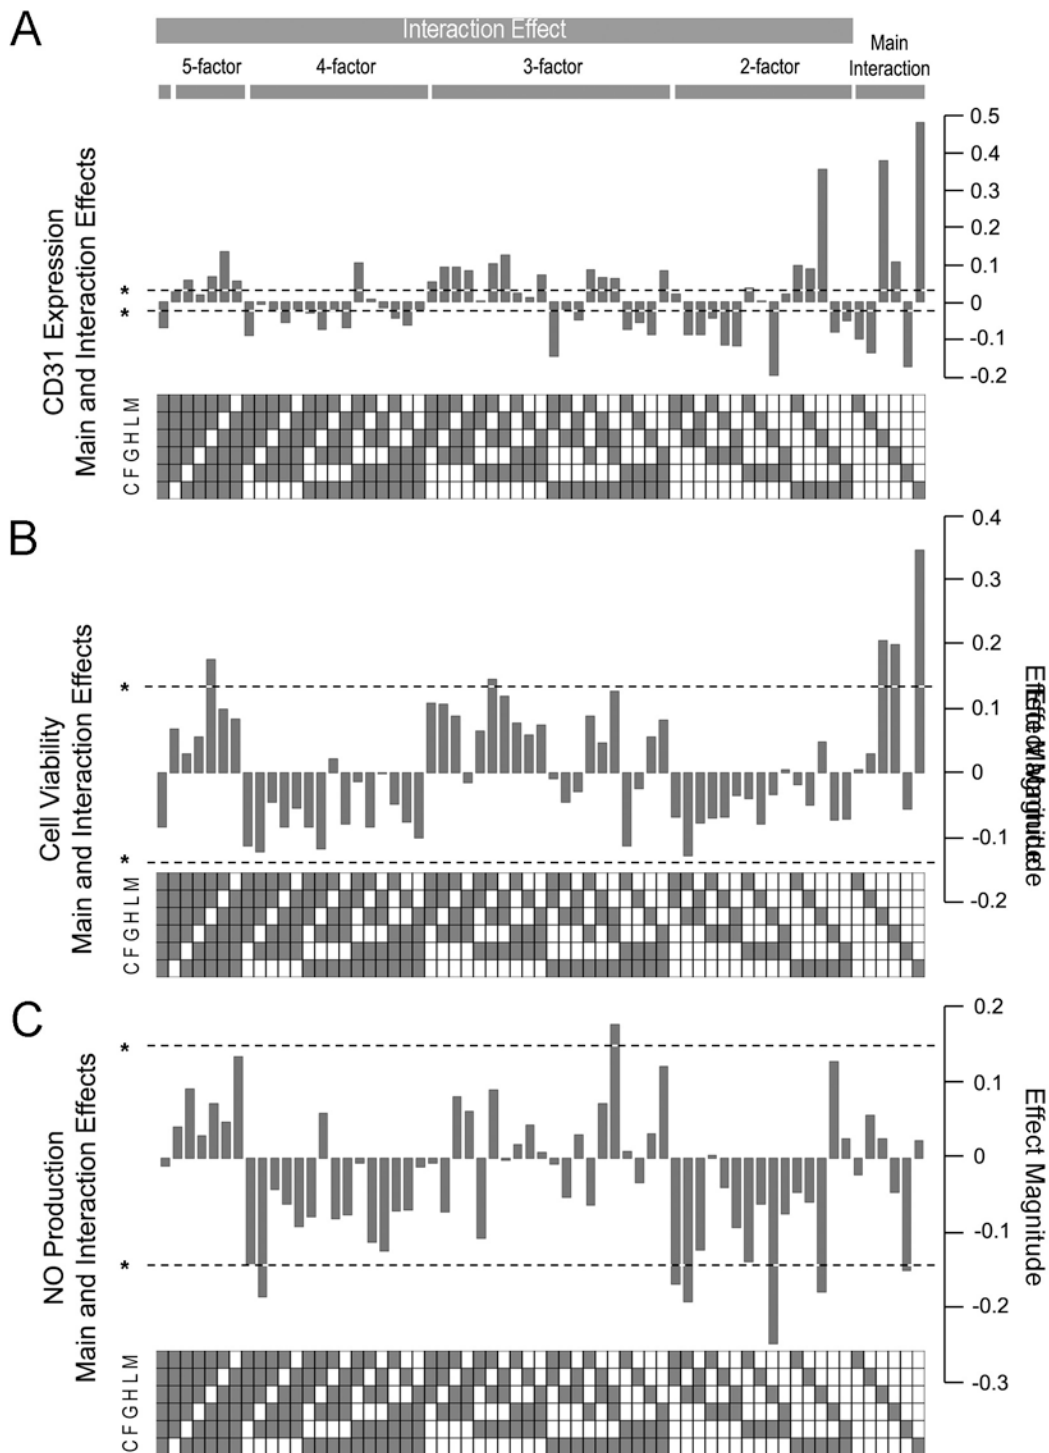

**Supplementary Figure 6. Multi-factorial analysis of ECM interactions.** (A) Main and multi-factorial ECM interactions based on cell viability. ECM combinations were grouped and ranked by 1-factor, 2-factor, 3-, 4-, 5- and 6-factor combinations. Dotted line indicates  $*p < 0.05$ . (B) Main and multi-factorial ECM interactions based on CD31 expression. (C) Main (1-factor) and multi-factorial ECM interactions on NO production.

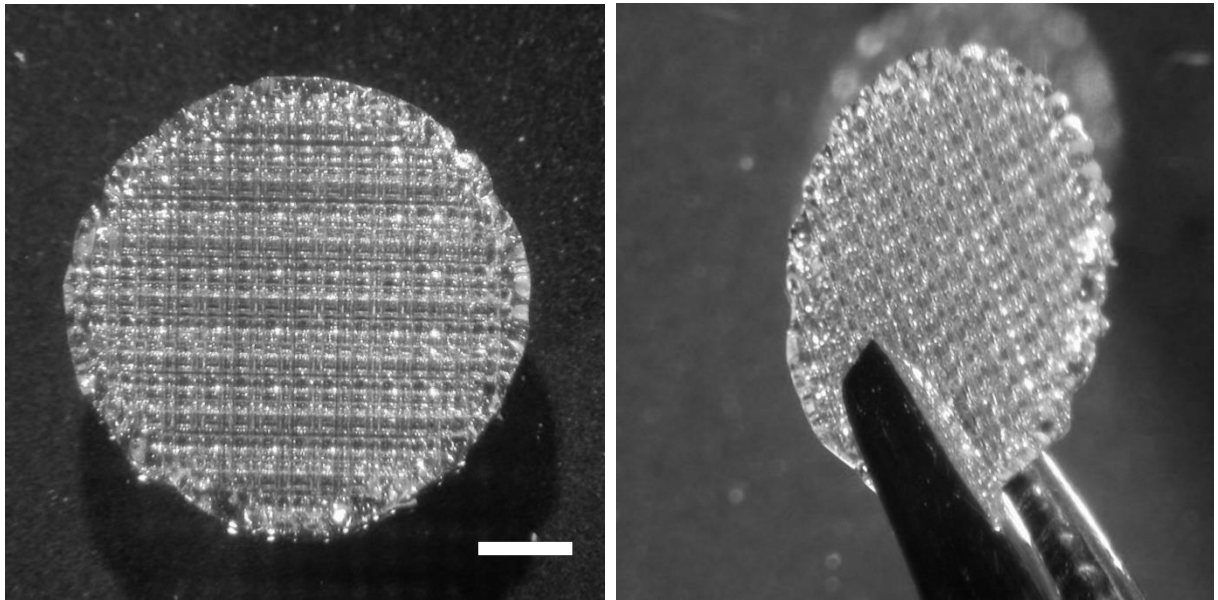

**Supplementary Figure 7. 3D Biotek polystyrene scaffold.** Bright field images of 3D scaffolds from different angles. Scale bar: 1 mm.



0 0.675 1.25 2.5 5 10 X10<sup>5</sup>

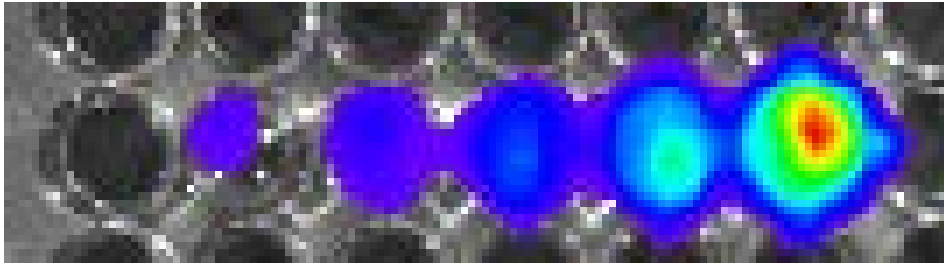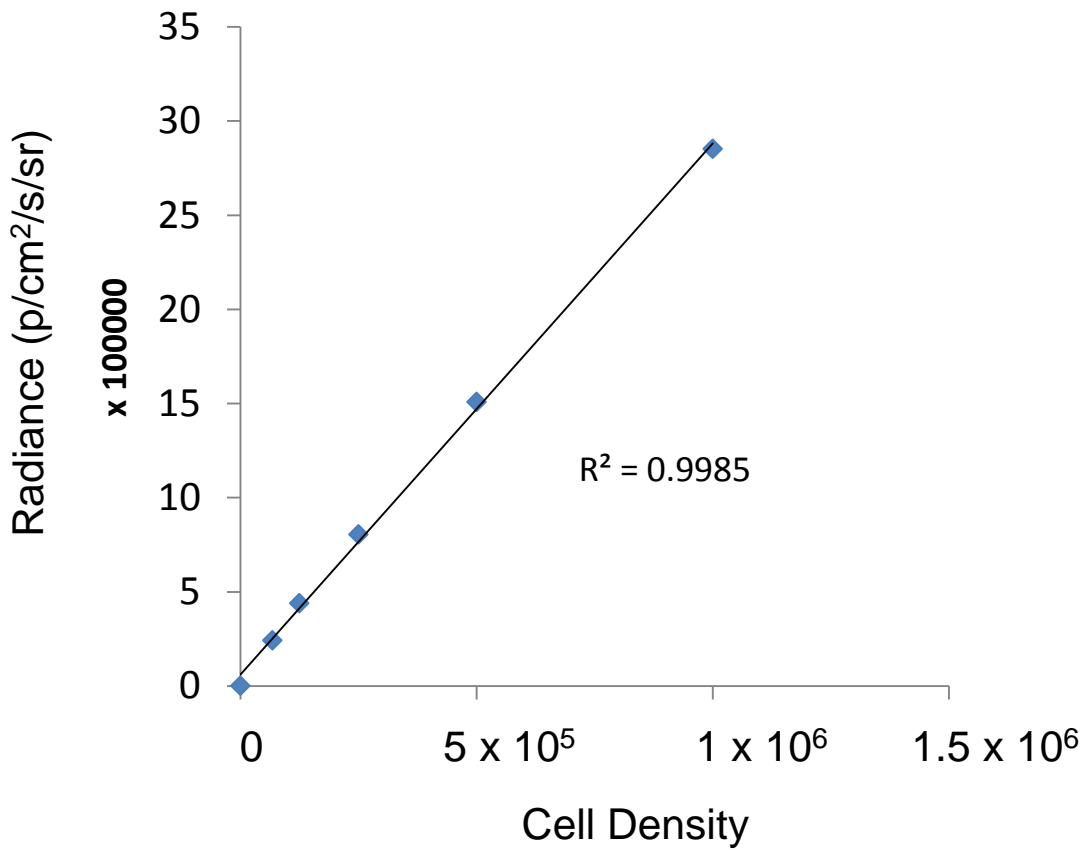

**Supplementary Figure 8. Linear correlation between viable cell number and bioluminescence intensity in human iPSC-ECs.**

## Supplemental Methods

**Fluorescence Activated Cell Sorting (FACS):** Human iPSC-ECs were purified using FACS after 14 day differentiation. Cells were dissociated with Accutase (Life Technologies) for 5 minutes at 37°C. 1xPBS containing 1% bovine serum albumin (BSA) was used for blocking. Cells were then passed through 70 µm cell strainer before incubating with fluorescein-conjugated CD31 antibody (eBioscience) for 30 minutes, followed by 1 mg/ml propidium iodide (1:1000). Cells incubated with isotype-matched antibody served as negative controls (**Supplementary Figure 2A and B**). Flow cytometry was performed with BD Digital Vantage cell sorter. Cells were then expanded using the EGM-2MV media (Lonza).

**Von Willebrand Factor (vWF) staining and acetylated low density lipoprotein (ac-LDL) uptake:** To characterize the phenotype and function of purified human iPSC-ECs, antibody against endothelial phenotypic marker von Willebrand factor (Abcam) was used. Cells were first fixed with 4% paraformaldehyde, permeabilized with Triton X-100 (0.1%) and then blocked with bovine serum albumin (1%) for 30 minutes, followed by overnight incubation of the primary antibody at 4°C. After washing with 1xPBS, cells were incubated with Alexa Fluor-594 secondary antibody for 1 hour at room temperature. Hoechst 33342 dye (Invitrogen) was used to stain for nuclei after 1xPBS wash. For ac-LDL uptake, Dil-labeled ac-LDL (5 µg/ml; Invitrogen) was used to incubate cells for 4 hours at 37 °C. 1xPBS was used to wash the cells, which were then visualized and photographed under fluorescent microscope.

**Seeding and bioluminescence imaging (BLI) of iPSC-ECs for linear correlation:** To determine the correlation of cell density and firefly luciferase activity, bioluminescent iPSC-ECs were seeded in 96-well plate overnight at 37°C with varying densities: 0,  $6.75 \times 10^4$ ,  $1.25 \times 10^5$ ,  $2.5 \times 10^5$ ,  $5 \times 10^5$ ,  $1 \times 10^6$ . Cells were then incubated with reporter probe D-luciferin (150 µg/ml) for 2 min, followed by BLI performed using the In Vivo Imaging System 200 system (IVIS200; Caliper Life Sciences). The BLI intensity was expressed in units of photons/cm<sup>2</sup>/second/steradian. Linear correlation was identified with R=0.99 (**Supplementary Figure 5**).
